# Supplementary material for: Moonlighting and the Transition to Full-Time Entrepreneurship
Source: Research Square preprint supplement (doi:10.21203/rs.3.rs-7819449/v1), 2025-10-29
Supplement: Supplementary file 1 [file c3131bebc227bed51e34e3f1.docx]

| Model 1: Probit with Average Marginal Effects | | | |
| --- | --- | --- | --- |
|  | (1) | (2) | (3) |
|  | All | Men | Women |
| VARIABLES | AMEs | AMEs | AMEs |
|  |  |  |  |
| Ln(Primary Job Income) | 0.003** | 0.007*** | 0.000 |
|  | (0.001) | (0.002) | (0.002) |
| Primary Job Hours | -0.000*** | -0.000*** | -0.000*** |
|  | (0.000) | (0.000) | (0.000) |
| Spouse’s Earnings | 0.000*** | 0.000*** | 0.000 |
|  | (0.000) | (0.000) | (0.000) |
| Moon 10 | 0.002 | 0.004 | -0.001 |
|  | (0.003) | (0.004) | (0.003) |
| Moon 25 | 0.001 | 0.004 | -0.002 |
|  | (0.003) | (0.006) | (0.004) |
| Moon 50 | 0.013** | 0.023* | 0.005 |
|  | (0.007) | (0.012) | (0.007) |
| Married | 0.007 | 0.015** | 0.001 |
|  | (0.004) | (0.007) | (0.005) |
| Only Earner | 0.004 | 0.013 | -0.000 |
|  | (0.006) | (0.012) | (0.006) |
| Married x Only Earner | -0.002 | -0.008 | -0.002 |
|  | (0.006) | (0.008) | (0.007) |
| Has Kids | -0.002 | -0.002 | -0.004 |
|  | (0.002) | (0.004) | (0.003) |
| Employer Health Insurance | -0.010*** | -0.016*** | -0.006* |
|  | (0.003) | (0.005) | (0.003) |
| Spouse Employer HI | 0.000 | -0.001 | 0.003 |
|  | (0.003) | (0.004) | (0.004) |
|  |  |  |  |
| Observations | 13,550 | 6,848 | 5,575 |
| Base rate | 0.0142 | 0.0202 | 0.00969 |
| N | 13550 | 6848 | 5575 |

Standard errors in parentheses

*** p<0.01, ** p<0.05, * p<0.1

| Model 1: Logit – Average Marginal Effects | | | |
| --- | --- | --- | --- |
|  | (1) | (2) | (3) |
|  | All | Men | Women |
| VARIABLES | AMEs | AMEs | AMEs |
|  |  |  |  |
| Ln(Primary Job Income) | 0.003** | 0.007*** | -0.000 |
|  | (0.001) | (0.002) | (0.002) |
| Primary Job Hours | -0.000*** | -0.000*** | -0.000*** |
|  | (0.000) | (0.000) | (0.000) |
| Spouse’s Earnings | 0.000*** | 0.000*** | 0.000 |
|  | (0.000) | (0.000) | (0.000) |
| Moon 10 | 0.001 | 0.003 | -0.001 |
|  | (0.003) | (0.004) | (0.003) |
| Moon 25 | 0.000 | 0.003 | -0.003 |
|  | (0.003) | (0.006) | (0.004) |
| Moon 50 | 0.014** | 0.024* | 0.005 |
|  | (0.007) | (0.013) | (0.008) |
| Married | 0.007 | 0.015* | 0.001 |
|  | (0.005) | (0.008) | (0.006) |
| Only Earner | 0.004 | 0.012 | -0.000 |
|  | (0.006) | (0.014) | (0.006) |
| Married x Only Earner | -0.001 | -0.007 | -0.002 |
|  | (0.006) | (0.009) | (0.007) |
| Has Kids | -0.002 | -0.002 | -0.005 |
|  | (0.002) | (0.004) | (0.003) |
| Employer Health Insurance | -0.010*** | -0.016*** | -0.006 |
|  | (0.003) | (0.005) | (0.004) |
| Spouse Employer HI | 0.000 | -0.001 | 0.003 |
|  | (0.003) | (0.004) | (0.004) |
|  |  |  |  |
| Observations | 13,550 | 6,848 | 5,575 |
| Base rate | 0.0142 | 0.0202 | 0.00969 |
| N | 13550 | 6848 | 5575 |

Standard errors in parentheses

*** p<0.01, ** p<0.05, * p<0.1

| Model 1: Continuous Moonlighting Share of Income | | | |
| --- | --- | --- | --- |
|  | (1) | (2) | (3) |
| VARIABLES | All | Men | Women |
|  |  |  |  |
| Ln(Primary Job Income) | 0.00555*** | 0.00887*** | 0.000971 |
|  | (0.00187) | (0.00278) | (0.00231) |
| Primary Job Hours | -0.000456*** | -0.000514*** | -0.000393*** |
|  | (9.92e-05) | (0.000155) | (0.000110) |
| Moonlighting Share of Income | 0.0277*** | 0.0424*** | 0.00924 |
|  | (0.00780) | (0.0130) | (0.00780) |
| Married | 0.00667* | 0.0129** | 0.00114 |
|  | (0.00359) | (0.00539) | (0.00496) |
| Only Earner | 0.00373 | 0.00954 | 5.93e-05 |
|  | (0.00420) | (0.00658) | (0.00542) |
| Married x Only Earner | 1.49e-06 | -0.00318 | -0.00212 |
|  | (0.00539) | (0.00723) | (0.00732) |
| Has Kids | -0.00248 | -0.00109 | -0.00445* |
|  | (0.00231) | (0.00412) | (0.00259) |
| Spouse’s Earnings | 1.21e-06 | 2.95e-06* | 5.02e-07 |
|  | (7.39e-07) | (1.65e-06) | (7.13e-07) |
| Employer Health Insurance | -0.00839*** | -0.0128*** | -0.00402 |
|  | (0.00262) | (0.00423) | (0.00306) |
| Spouse Employer HI | -0.00180 | -0.00431 | 0.000799 |
|  | (0.00289) | (0.00449) | (0.00345) |
| Constant | -0.0264 | -0.0794** | 0.0200 |
|  | (0.0270) | (0.0370) | (0.0389) |
|  |  |  |  |
| Observations | 13,550 | 7,128 | 6,422 |
| R-squared | 0.014 | 0.018 | 0.013 |

Robust standard errors in parentheses

*** p<0.01, ** p<0.05, * p<0.1

| Model 1: Alternate Self-Employment Definitions | | | | |
| --- | --- | --- | --- | --- |
|  | (1) | (2) | (3) | (4) |
| VARIABLES | Part-Time | Full-Time | Only Full-Time SE | Incorporated |
|  |  |  |  |  |
| Ln(Primary Job Income) | 0.0101*** | 0.00504*** | 0.00380** | 0.00339*** |
|  | (0.00252) | (0.00191) | (0.00162) | (0.000844) |
| Primary Job Hours | -0.000751*** | -0.000462*** | -0.000456*** | -0.000241*** |
|  | (0.000126) | (9.95e-05) | (8.63e-05) | (6.23e-05) |
| Moon 10 | 0.00549 | 0.00118 | -0.000924 | -9.27e-05 |
|  | (0.00364) | (0.00251) | (0.00170) | (0.00106) |
| Moon 25 | 0.00712 | 0.00126 | -0.000489 | 0.00188 |
|  | (0.00536) | (0.00352) | (0.00230) | (0.00173) |
| Moon 50 | 0.0233** | 0.0175*** | 0.0191*** | 0.00398 |
|  | (0.00934) | (0.00675) | (0.00572) | (0.00317) |
| Married | 0.00837 | 0.00675* | 0.00543** | 0.00267*** |
|  | (0.00553) | (0.00359) | (0.00226) | (0.000910) |
| Only Earner | 0.00727 | 0.00380 | 0.00457 | 0.00286* |
|  | (0.00618) | (0.00420) | (0.00294) | (0.00165) |
| Married x Only Earner | -0.00597 | 1.14e-05 | 0.00178 | -0.00206 |
|  | (0.00776) | (0.00539) | (0.00391) | (0.00215) |
| Has Kids | -0.00584* | -0.00250 | -0.00252 | 0.000447 |
|  | (0.00335) | (0.00230) | (0.00173) | (0.00108) |
| Spouse’s Earnings | 8.68e-07 | 1.22e-06* | 1.10e-06 | 6.90e-07 |
|  | (8.73e-07) | (7.39e-07) | (6.96e-07) | (5.49e-07) |
| Employer Health Insurance | -0.0174*** | -0.00850*** | -0.00799*** | -0.00112 |
|  | (0.00386) | (0.00265) | (0.00213) | (0.00121) |
| Spouse Employer HI | 0.00160 | -0.00168 | 0.000173 | -0.000653 |
|  | (0.00421) | (0.00288) | (0.00203) | (0.00127) |
| Constant | -0.0398 | -0.0208 | -0.0127 | -0.0148* |
|  | (0.0396) | (0.0275) | (0.0213) | (0.00855) |
|  |  |  |  |  |
| Observations | 13,550 | 13,550 | 13,550 | 13,550 |
| R-squared | 0.018 | 0.014 | 0.019 | 0.011 |

Robust standard errors in parentheses

*** p<0.01, ** p<0.05, * p<0.1

| Model 2: Probit with Average Marginal Effects | | | |
| --- | --- | --- | --- |
|  | (1) | (2) | (3) |
| VARIABLES | All | Men | Women |
|  |  |  |  |
| Ln(Primary Job Income) | 0.029*** | 0.039*** | 0.015*** |
|  | (0.007) | (0.010) | (0.008) |
| Primary Job Hours | -0.002*** | -0.002*** | -0.002*** |
|  | (0.000) | (0.000) | (0.000) |
| Moon 10 | 0.016 | 0.007 | 0.029*** |
|  | (0.011) | (0.017) | (0.014) |
| Moon 25 | 0.018 | 0.049*** | -0.021 |
|  | (0.016) | (0.023) | (0.019) |
| Moon 50 | 0.061*** | 0.065*** | 0.048*** |
|  | (0.022) | (0.033) | (0.026) |
| Married | -0.003 | 0.019 | -0.024 |
|  | (0.021) | (0.031) | (0.027) |
| Only Earner | -0.005 | -0.005 | -0.011 |
|  | (0.023) | (0.035) | (0.027) |
| Married x Only Earner | 0.026 | 0.031 | 0.012 |
|  | (0.026) | (0.038) | (0.037) |
| Has Kids | -0.005 | -0.006 | -0.014 |
|  | (0.011) | (0.016) | (0.013) |
| Spouse’s Earnings | 0.000 | 0.000 | 0.000 |
|  | (0.000) | (0.000) | (0.000) |
| Employer Health Insurance | -0.033*** | -0.054*** | -0.012 |
|  | (0.012) | (0.019) | (0.014) |
| Spouse Employer HI | 0.009 | 0.020 | -0.005 |
|  | (0.014) | (0.020) | (0.019) |
|  |  |  |  |
| Observations | 4,051 | 2,274 | 1,777 |
| Model | Probit AMEs | Probit AMEs | Probit AMEs |
| Standard errors in parentheses |  |  |  |
| *** p<0.1, ** p<0.05, * p<0.01 |  |  |  |

| Model 2: Logit with Average Marginal Effects | | | |
| --- | --- | --- | --- |
|  | (1) | (2) | (3) |
| VARIABLES | All | Men | Women |
|  |  |  |  |
| Ln(Primary Job Income) | 0.029*** | 0.038*** | 0.016*** |
|  | (0.007) | (0.010) | (0.009) |
| Primary Job Hours | -0.002*** | -0.002*** | -0.002*** |
|  | (0.000) | (0.000) | (0.000) |
| Moon 10 | 0.016 | 0.006 | 0.031*** |
|  | (0.012) | (0.017) | (0.014) |
| Moon 25 | 0.018 | 0.048*** | -0.019 |
|  | (0.016) | (0.023) | (0.020) |
| Moon 50 | 0.058*** | 0.060*** | 0.046*** |
|  | (0.021) | (0.031) | (0.025) |
| Married | -0.001 | 0.022 | -0.027 |
|  | (0.022) | (0.032) | (0.027) |
| Only Earner | -0.005 | -0.005 | -0.015 |
|  | (0.023) | (0.036) | (0.026) |
| Married x Only Earner | 0.025 | 0.031 | 0.014 |
|  | (0.026) | (0.039) | (0.037) |
| Has Kids | -0.005 | -0.005 | -0.014 |
|  | (0.011) | (0.016) | (0.014) |
| Spouse’s Earnings | 0.000 | 0.000 | 0.000 |
|  | (0.000) | (0.000) | (0.000) |
| Employer Health Insurance | -0.035*** | -0.056*** | -0.013 |
|  | (0.012) | (0.019) | (0.014) |
| Spouse Employer HI | 0.011 | 0.022 | -0.004 |
|  | (0.014) | (0.020) | (0.020) |
|  |  |  |  |
| Observations | 4,051 | 2,274 | 1,777 |
| Model | Logit AMEs | Logit AMEs | Logit AMEs |
| Standard errors in parentheses |  |  |  |
| *** p<0.1, ** p<0.05, * p<0.01 |  |  |  |

| Model 2: Continuous Moonlighting Share of Income | | | |
| --- | --- | --- | --- |
|  | (1) | (2) | (3) |
| VARIABLES | All | Men | Women |
|  |  |  |  |
| Ln(Primary Job Income) | 0.0264*** | 0.0327*** | 0.0154*** |
|  | (0.00354) | (0.00537) | (0.00454) |
| Primary Job Hours | -0.00175*** | -0.00208*** | -0.00140*** |
|  | (0.000173) | (0.000253) | (0.000220) |
| Moonlighting Share of Income | 0.0871*** | 0.111*** | 0.0527*** |
|  | (0.0147) | (0.0226) | (0.0183) |
| Married | 0.00127 | 0.0295** | -0.0256** |
|  | (0.00886) | (0.0129) | (0.0123) |
| Only Earner | -0.00876 | 0.000531 | -0.0136 |
|  | (0.00962) | (0.0143) | (0.0130) |
| Married x Only Earner | 0.00581 | -0.00682 | 0.00951 |
|  | (0.0116) | (0.0160) | (0.0167) |
| Has Kids | -0.00217 | 0.00373 | -0.0106* |
|  | (0.00473) | (0.00758) | (0.00604) |
| Spouse’s Earnings | 1.89e-06* | 4.34e-06** | 1.73e-06 |
|  | (1.11e-06) | (2.08e-06) | (1.30e-06) |
| Employer Health Insurance | -0.0289*** | -0.0432*** | -0.0173*** |
|  | (0.00539) | (0.00861) | (0.00649) |
| Spouse Employer HI | -0.00806 | -0.0141 | -0.000182 |
|  | (0.00632) | (0.00939) | (0.00815) |
| Constant | -0.0142 | -0.169** | 0.123* |
|  | (0.0539) | (0.0771) | (0.0745) |
|  |  |  |  |
| Observations | 15,302 | 8,060 | 7,242 |
| R-squared | 0.033 | 0.039 | 0.023 |

| Model 2: Alternate Definitions of Self-Employment | | | | |
| --- | --- | --- | --- | --- |
|  | (1) | (2) | (3) | (4) |
| VARIABLES | Part-Time | Full-Time | Only Full-Time SE | Incorporated |
|  |  |  |  |  |
| Ln(Primary Job Income) | 0.0253*** | 0.0249*** | 0.0179*** | 0.0123*** |
|  | (0.00418) | (0.00352) | (0.00291) | (0.00209) |
| Primary Job Hours | -0.00225*** | -0.00175*** | -0.00156*** | -0.000801*** |
|  | (0.000197) | (0.000174) | (0.000152) | (0.000114) |
| Moon 10 | 0.0227*** | 0.0132** | 0.00421 | 0.00177 |
|  | (0.00659) | (0.00521) | (0.00400) | (0.00264) |
| Moon 25 | 0.0134 | 0.00838 | 0.00599 | 0.00792** |
|  | (0.00929) | (0.00739) | (0.00577) | (0.00403) |
| Moon 50 | 0.0493*** | 0.0333*** | 0.0273*** | 0.0167** |
|  | (0.0146) | (0.0118) | (0.00964) | (0.00684) |
| Married | 0.0127 | 0.00154 | 0.00309 | 0.00799** |
|  | (0.0107) | (0.00886) | (0.00691) | (0.00397) |
| Only Earner | -0.00657 | -0.00845 | -0.00321 | 0.00179 |
|  | (0.0115) | (0.00962) | (0.00771) | (0.00446) |
| Married x Only Earner | 0.00494 | 0.00599 | 0.0119 | -0.000402 |
|  | (0.0143) | (0.0116) | (0.00926) | (0.00577) |
| Has Kids | -0.0111* | -0.00225 | -0.00375 | -0.000358 |
|  | (0.00609) | (0.00473) | (0.00373) | (0.00244) |
| Spouse’s Earnings | 1.71e-06 | 1.93e-06* | 2.93e-06*** | 2.03e-06** |
|  | (1.29e-06) | (1.11e-06) | (1.04e-06) | (8.25e-07) |
| Employer Health Insurance | -0.0361*** | -0.0286*** | -0.0329*** | -0.00694** |
|  | (0.00679) | (0.00541) | (0.00447) | (0.00289) |
| Spouse Employer HI | -0.0127 | -0.00808 | -0.00820* | -0.00393 |
|  | (0.00796) | (0.00633) | (0.00498) | (0.00348) |
| Constant | -0.00844 | -0.00240 | 0.0307 | -0.0172 |
|  | (0.0668) | (0.0540) | (0.0467) | (0.0299) |
|  |  |  |  |  |
| Observations | 15,302 | 15,302 | 15,302 | 15,302 |
| R-squared | 0.038 | 0.032 | 0.034 | 0.025 |
